# Supplementary material for: Metabolomics Reveals Discrimination of Chinese Propolis from Different Climatic Regions
Source: PubMed Central journal article supplement (PMC7230208; doi:10.3390/foods9040491), 2020-04-14
Supplement: foods-09-00491-s001.pdf [file foods-09-00491-s001.pdf]

# Metabolomics Reveals Discrimination of Chinese Propolis from Different Climatic Regions

Tongtong Wang <sup>1,2</sup>, Quanhui Liu <sup>1,2</sup>, Min Wang <sup>1,2,\*</sup> and Limin Zhang <sup>3</sup>

<sup>1</sup> Institute of Quality Standard and Testing Technology for Agro-Products, Chinese Academy of Agricultural Sciences (CAAS), 100081 Beijing, P.R. China; wangttong123@126.com (T.W.); liuquanhui951010@126.com (Q.L.)

<sup>2</sup> Key Laboratory of Agro-food Safety and Quality, Ministry of Agriculture, 100081 Beijing, P.R. China;

<sup>3</sup> CAS Key Laboratory of Magnetic Resonance in Biological Systems, State Key Laboratory of Magnetic Resonance and Atomic and Molecular Physics, National Centre for Magnetic Resonance in Wuhan, Wuhan Institute of Physics and Mathematics, Chinese Academy of Sciences (CAS), Wuhan National Research Center for Optoelectronics, 430071 Wuhan, P.R. China; zhanglm@wipm.ac.cn

\* Correspondence: wangmin@caas.cn; Tel: +86-010-82106545

Received: 12 February 2020; Accepted: 7 April 2020; Published: date

**Table S1.** Assignment of chemical compositions in CWTP and CMTP.

| No. | Types    | Identified compound | Structure of compound                                                               | Characteristic $\delta^1\text{H}$ (ppm) and multiplicity                                       | $\delta^{13}\text{C}$ (ppm)                                                                                                                                                           |
|-----|----------|---------------------|-------------------------------------------------------------------------------------|------------------------------------------------------------------------------------------------|---------------------------------------------------------------------------------------------------------------------------------------------------------------------------------------|
| 1   |          | Chrysin             | 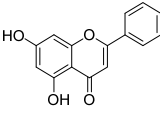   | 7.86 (d, $J = 7.3$ Hz), 6.49 (d, $J = 1.8$ Hz, H-8), 6.34 (d, $J = 1.8$ Hz, H-6).              | 163.3 (C-2), 105.5 (C-3),<br>161.0 (C-5), 99.0 (C-6),<br>164.4 (C-7), 94.3 (C-8),<br>103.7 (C-10), 131.0 (C-1'),<br>126.4 (C-3' and 5'), 129.3<br>(C-2' and 6'), 132.0 (C-4').        |
| 2   | Flavone  | Apigenin            |    | 7.89 (d, $J = 7.0, 1.2$ Hz, H-2' and 6'), 6.53 (d, $J = 2.0$ Hz, H-8).                         | 164.4 (C-2), 105.3 (C-3),<br>162.0 (C-5), 99.8 (C-6),<br>164.2 (C-7), 94.5 (C-8),<br>158.0 (C-9), 103.7 (C-10),<br>128.5 (C-2' and 6'), 116.0<br>(C-3' and 5'), 162.5 (C-4').         |
| 3   |          | Luteolin            |  | 6.70 (s, H-3), 6.88 (d, $J = 8.4$ Hz, H-5').                                                   | 164.2 (C-2), 105.5 (C-3),<br>162.0 (C-5), 99.0 (C-6),<br>164.5 (C-7), 94.3 (C-8),<br>158.0 (C-9), 103.7 (C-10),<br>113.1 (C-2'), 146.6 (C-3'),<br>150.1 (C-4'), 115.7 (C-5').         |
| 4   |          | Quercetin           |  | 6.91 (d, $J = 8.0$ Hz, H-5'), 7.74 (dd, $J = 8.0, 2.0$ Hz, H-2').                              | 146.6 (C-2), 135.1 (C-3),<br>161.5 (C-5), 98.4 (C-6),<br>163.7 (C-7), 94.5 (C-8),<br>156.0 (C-9), 102.9 (C-10),<br>122.4 (C-1'), 115.2 (C-2'),<br>145.1 (C-3'), 115.4 (C-5').         |
| 5   | Flavonol | Kaempferol          |  | 8.09 (d, $J = 8.2$ Hz, H-2' and 6'), 6.38 (d, $J = 2.0$ Hz, H-8).                              | 146.7 (C-2), 136.1 (C-3),<br>161.5 (C-5), 98.4 (C-6),<br>163.1 (C-7), 93.5 (C-8),<br>103.1 (C-10), 122.4 (C-1'),<br>129.5 (C-2' and C-6'),<br>115.4 (C-3' and C-5'),<br>158.0 (C-4'). |
| 6   |          | Galangin            |  | 8.18 (d, $J = 7.6$ Hz, H-2' and 6'), 6.49 (d, $J = 1.8$ Hz, H-8), 6.28 (d, $J = 1.8$ Hz, H-6). | 145.5 (C-2), 138.0 (C-3),<br>178.3 (C-4), 161.0 (C-5),<br>98.4 (C-6), 164.4 (C-7),                                                                                                    |

|            |                                 |                                                                                     |                                                                                                                       |                                                                                                                                                                                                                                                       |
|------------|---------------------------------|-------------------------------------------------------------------------------------|-----------------------------------------------------------------------------------------------------------------------|-------------------------------------------------------------------------------------------------------------------------------------------------------------------------------------------------------------------------------------------------------|
|            |                                 |                                                                                     |                                                                                                                       | 93.6 (C-8), 157.0 (C-9),<br>102.4 (C-10), 122.5 (C-1'),<br>127.6 (C-2' and C-6'),<br>128.6 (C-3' and C-5'),<br>130.0 (C-4').                                                                                                                          |
| 7          | Pinobanks<br>in                 | 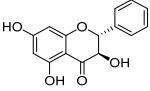   | 5.08 (d, $J = 11.9$ Hz, H-3), 4.56 (d, $J = 11.9$ Hz, H-2).                                                           | 83.3 (C-2), 72.4 (C-3),<br>195.9 (C-4), 163.1 (C-5),<br>96.0 (C-6), 163.7 (C-7),<br>96.8 (C-8), 167.7 (C-9),<br>100.6 (C-10), 136.5 (C-1'),<br>127.6 (C-2' and 6'), 128.7<br>(C-3' and 5'), 129.1 (C-4').                                             |
| Flavanonol |                                 |                                                                                     |                                                                                                                       |                                                                                                                                                                                                                                                       |
| 8          | Pinobanks<br>in-3-O-<br>acetate |    | 6.08 (d, $J = 2.0$ Hz, H-8), 6.03 (d, $J = 2.0$ Hz, H-6), 5.81 (d, $J = 12.0$ Hz, H-3), 2.03 (s, CH <sub>3</sub> -3). | 20.3 (CH <sub>3</sub> ), 168.1 (acetyl),<br>81.2 (C-2), 72.4 (C-3),<br>191.5 (C-4), 165.5 (C-5),<br>96.8 (C-6), 167.7 (C-7),<br>95.7 (C-8), 163.0 (C-9),<br>101.6 (C-10), 136.1 (C-1'),<br>128.0 (C-2' and 6'), 128.9<br>(C-3' and 5'), 129.5 (C-4'). |
| 9          | Pinocemb<br>rin                 |  | 2.82 (dd, $J = 17.2, 3.2$ Hz, H-3),<br>3.09 (dd, $J = 17.2, 13.1$ Hz, H-3),<br>5.41 (dd, $J = 13.1, 3.2$ Hz, H-2).    | 79.2 (C-2), 43.3 (C-3),<br>195.8 (C-4), 165.5 (C-5),<br>96.8 (C-6), 167.7 (C-7),<br>95.2 (C-8), 164.2 (C-9),<br>102.9 (C-10), 138.3 (C-1'),<br>127.4 (C-2' and 6'), 129.1<br>(C-3' and 5'), 129.3 (C-4').                                             |
| Flavanone  |                                 |                                                                                     |                                                                                                                       |                                                                                                                                                                                                                                                       |
| 10         | Pinostrobin                     |  | 2.84 (dd, $J = 17.2, 3.2$ Hz, H-3),<br>3.11 (dd, $J = 17.2, 13.1$ Hz, H-3),<br>5.43 (dd, $J = 13.1, 3.2$ Hz, H-2).    | 55.7 (OCH <sub>3</sub> ), 79.2 (C-2),<br>43.2 (C-3), 195.6 (C-4),<br>164.2 (C-5), 95.2 (C-6),<br>168.1 (C-7), 94.0 (C-8),<br>162.8 (C-9), 103.1 (C-10),<br>138.3 (C-1'), 126.1 (C-2'<br>and 6'), 128.9 (C-3' and 5'),<br>129.5 (C-4').                |
| 11         | Phenolic<br>acid                |  | 6.43 (d, $J = 16.0$ Hz, H-2), 7.73 (d, $J = 16.0$ Hz, H-1).                                                           | 169.5 (C-1), 118.5 (C-2),<br>146.7 (C-3), 136.1 (C-1'),<br>129.5 (C-2' and 6'), 130.7<br>(C-3' and 5'), 131.0 (C-4').                                                                                                                                 |
| 12         | 3,4-<br>Dimethox                |  | 6.34 (d, $J = 16.0$ Hz, H-2), 7.68 (d, $J = 16.0$ Hz, H-1), 3.90 (s, OCH <sub>3</sub> ),                              | 169.5 (C-1), 115.9 (C-2),<br>146.7 (C-3), 127.4 (C-1'),                                                                                                                                                                                               |

|    |                                          |                                                                                     |                                                                                                                                                |                                                                                                                                                                                                                                             |
|----|------------------------------------------|-------------------------------------------------------------------------------------|------------------------------------------------------------------------------------------------------------------------------------------------|---------------------------------------------------------------------------------------------------------------------------------------------------------------------------------------------------------------------------------------------|
|    | ycinnamic acid                           |                                                                                     | 3.92 (s, OCH <sub>3</sub> ).                                                                                                                   | 110.5 (C-2'), 147.0 (C-3'), 156.7 (C-4'), 115.3 (C-5'), 124.1 (C-6'), 56.0 (OCH <sub>3</sub> ), 55.7 (OCH <sub>3</sub> ).                                                                                                                   |
| 13 | <i>p</i> -Coumaric acid                  | 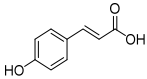   | 6.33 (d, <i>J</i> = 16.0 Hz, H-2), 6.85 (d, <i>J</i> = 8.0 Hz, H-3' and 5').                                                                   | 118.5 (C-2), 147.1 (C-3), 134.0 (C-1'), 128.4 (C-2' and 6'), 129.0 (C-3' and 5'), 130.8 (C-4').                                                                                                                                             |
| 14 | Caffeic acid                             |    | 7.06 (d, <i>J</i> = 2.0 Hz, H-2'), 6.98 (dd, <i>J</i> = 8.0, 2.0 Hz, H-6'), 6.30 (d, <i>J</i> = 16.0 Hz, H-5').                                | 115.4 (C-2), 147.0 (C-3), 127.7 (C-1'), 115.1 (C-2'), 149.4 (C-3'), 146.7 (C-4'), 116.5 (C-5'), 122.8 (C-6').                                                                                                                               |
| 15 | Ferulic acid                             |  | 7.61 (d, <i>J</i> = 16.0 Hz, H-1), 6.33 (d, <i>J</i> = 16.0 Hz, H-2), 7.07 (dd, <i>J</i> = 8.0, 2.0 Hz, H-6'), 3.84 (s, OCH <sub>3</sub> -3'). | 56.4 (OCH <sub>3</sub> ), 111.7 (C-2), 149.4 (C-3), 127.6 (C-1'), 116.6 (C-2'), 150.5 (C-3'), 147.1 (C-4'), 115.9 (C-5'), 124.1 (C-6').                                                                                                     |
| 16 | <i>iso</i> Ferulic acid                  |  | 6.24 (d, <i>J</i> = 16.0 Hz, H-2), 7.07 (dd, <i>J</i> = 8.0, 2.0 Hz, H-6'), 3.93 (s, OCH <sub>3</sub> -4').                                    | 55.7 (OCH <sub>3</sub> ), 167.7 (C-1), 122.4 (C-2), 144.1 (C-3), 127.3 (C-1'), 114.2 (C-2'), 146.6 (C-3'), 149.9 (C-4'), 113.0 (C-5'), 115.9 (C-6').                                                                                        |
| 17 | Phenolic acid ester<br>Cinnamyl caffeate |  | 4.71 (t, <i>J</i> = 6.0 Hz, CH <sub>2</sub> -1'), 6.71 (dt, <i>J</i> = 15.8, 2.1 Hz, H-3'), 6.40 (dt, <i>J</i> = 15.8, 6.0 Hz, H-2').          | 169.0 (C-1), 116.5 (C-2), 147.1 (C-3), 129.0 (C-1'), 114.9 (C-2'), 146.7 (C-3'), 149.6 (C-4'), 115.1 (C-5'), 123.0 (C-6' and 8''), 137.8 (C-1''), 127.7 (C-2'' and 6''), 129.6 (C-3'' and 5''), 124.6 (C-4''), 135.0 (C-7''), 66.0 (C-9''). |
| 18 | Phenethyl caffeate (CAPE)                |  | 4.32 (t, <i>J</i> = 6.6 Hz, CH <sub>2</sub> -1'), 3.02 (t, <i>J</i> = 7.0 Hz, CH <sub>2</sub> -2').                                            | 167.7 (C-1), 114.2 (C-2), 145.2 (C-3), 127.6 (C-1'), 115.5 (C-2' and 5'), 146.5 (C-3'), 144.0 (C-4'), 126.6                                                                                                                                 |

|    |                                |                                                                                   |                                                                                                                                                                                                        |
|----|--------------------------------|-----------------------------------------------------------------------------------|--------------------------------------------------------------------------------------------------------------------------------------------------------------------------------------------------------|
|    |                                |                                                                                   | (C-6'), 138.3 (C-1''), 128.5 (C-2'' and 6''), 128.9 (C-3'' and 5''), 122.5 (C-4''), 36.3 (C-7''), 65.2 (C-8'').                                                                                        |
| 19 | Benzyl<br>caffeate             | 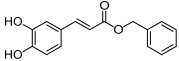 | 5.23 (s, CH <sub>2</sub> -1').                                                                                                                                                                         |
|    |                                |                                                                                   | 167.7 (C-1), 122.4 (C-2), 144.1 (C-3), 126.4 (C-1'), 114.2 (C-2'), 145.4 (C-4'), 114.2 (C-5'), 115.3 (C-6'), 136.0 (C-1''), 128.3 (C-2'' and 6''), 127.7 (C-3'' and 5''), 121.6 (C-4''), 65.3 (C-7''). |
| 20 | Aliphatic<br>acid              | -                                                                                 | 1.26 (brs, CH <sub>2</sub> ), 0.89 (t, <i>J</i> = 7.2 Hz, CH <sub>3</sub> ).                                                                                                                           |
| 21 | Other<br>compounds<br>Vanillin |  | 9.82 (s, CHO).                                                                                                                                                                                         |
|    |                                |                                                                                   | 191.5 (CHO), 56.0 (CH <sub>3</sub> O), 129.5 (C-1), 114.2 (C-2), 146.6 (C-3), 151.6 (C-4), 127.5 (C-6).                                                                                                |

s, single; d, doublet; t, triplet; q, quartet; m, multiplet; dd, doublet of doublet; dt, doublet of triplet; brs, broad single.

**Table S2.** OPLS-DA correlation coefficients p(corr) and VIP values of the discriminating compositions towards classification.

| No. | Component                  | Resonance<br>(ppm) | p(corr) | VIP |
|-----|----------------------------|--------------------|---------|-----|
| 1   | Chrysin                    | 7.86               | +0.70   | 2.6 |
| 2   | Apigenin                   | 7.89               | +0.75   | 1.3 |
| 5   | Kaempferol                 | 8.09               | +0.81   | 1.2 |
| 6   | Galangin                   | 8.18               | +0.63   | 2.2 |
| 9   | Pinocembrin                | 2.82               | -0.80   | 1.6 |
| 11  | Cinnamic acid              | 6.43               | +0.64   | 1.2 |
| 12  | 3,4-Dimethoxycinnamic acid | 6.34               | +0.72   | 2.6 |
| 13  | <i>p</i> -Coumaric acid    | 6.85               | +0.81   | 2.4 |
| 14  | Caffeic acid               | 6.30               | +0.70   | 1.2 |
| 15  | Ferulic acid               | 6.33               | +0.71   | 1.8 |
| 16  | <i>iso</i> Ferulic acid    | 6.24               | +0.65   | 1.5 |
| 17  | Cinnamyl caffeate          | 6.71               | +0.72   | 1.6 |
